# Supplementary material for: Solid-state synthesis of Si1−xGex nanoalloys with composition-tunable energy gaps and visible to near infrared optical properties
Source: Royal Society of Chemistry journal article supplement (doi:10.1039/d4nr03472d), 2024-12-04
Supplement: d4nr03472d1.pdf [file d4nr03472d1.pdf]

## Supplementary Information

# Solid-State Synthesis of $\text{Si}_{1-x}\text{Ge}_x$ Nanoalloys with Composition-Tunable Energy Gaps and Visible to Near Infrared Optical Properties

*Griffin C. Spence,<sup>1</sup> David S. Pate,<sup>2</sup> Corentin Villot,<sup>1</sup> Roshana M. Fouzie,<sup>1</sup> Lisa S. Graves,<sup>1</sup>*

*Ka Un Lao,<sup>1</sup> Ümit Özgür,<sup>2</sup> and Indika U. Arachchige,<sup>1,\*</sup>*

<sup>1</sup>Department of Chemistry, Virginia Commonwealth University, Richmond, Virginia 23284-  
2006, United States

<sup>2</sup>Department of Electrical and Computer Engineering, Virginia Commonwealth University,  
Richmond, Virginia 23284-9052, United States

Email: [iuarachchige@vcu.edu](mailto:iuarachchige@vcu.edu)

**Table S1.** Absorption onsets of Si<sub>1-x</sub>Ge<sub>x</sub> alloy NCs (x = 0 – 14.4%) obtained from indirect-gap Tauc analysis in the lower energy region along with lattice parameters and d-spacing values obtained from PXRD, SAED, and HRTEM studies.

| <b>Experimental Composition</b>         | <b>Tauc Indirect (<math>E_g^{i2}</math>)</b> | <b>Lattice Parameter (Å)</b> | <b>d-spacing, XRD (Å)</b> | <b>d-spacing, TEM (Å)</b> | <b>d-spacing, SAED (Å)</b> |
|-----------------------------------------|----------------------------------------------|------------------------------|---------------------------|---------------------------|----------------------------|
| Si <sub>1.000</sub> Ge <sub>0.000</sub> | 1.16                                         | 5.4361                       | 3.14                      | 3.12                      | 3.12                       |
| Si <sub>0.988</sub> Ge <sub>0.012</sub> | 1.15                                         | 5.4436                       | 3.15                      | 3.11                      | 3.13                       |
| Si <sub>0.957</sub> Ge <sub>0.043</sub> | 1.12                                         | 5.4475                       | 3.15                      | 3.12                      | 3.14                       |
| Si <sub>0.944</sub> Ge <sub>0.056</sub> | 1.12                                         | 5.4491                       | 3.16                      | 3.13                      | 3.15                       |
| Si <sub>0.914</sub> Ge <sub>0.086</sub> | 1.10                                         | 5.4587                       | 3.16                      | 3.13                      | 3.15                       |
| Si <sub>0.884</sub> Ge <sub>0.116</sub> | 1.22                                         | 5.4624                       | 3.16                      | 3.14                      | 3.16                       |
| Si <sub>0.856</sub> Ge <sub>0.144</sub> | 1.00                                         | 5.4711                       | 3.17                      | 3.14                      | 3.16                       |

**Table S2.** Experimental parameters used in the synthesis of Si and Si<sub>1-x</sub>Ge<sub>x</sub> alloy NCs.

| <b>Nominal Composition</b>              | <b>Exp. Si, %</b> | <b>Exp. Ge, %</b> | <b>Mass of GeI<sub>2</sub> (g)</b> | <b>Etching Time (h)</b> |
|-----------------------------------------|-------------------|-------------------|------------------------------------|-------------------------|
| Si <sub>1.000</sub> Ge <sub>0.000</sub> | 100               | 0                 | 0                                  | 1                       |
| Si <sub>0.950</sub> Ge <sub>0.050</sub> | 98.79             | 1.21              | 0.240                              | 16                      |
| Si <sub>0.935</sub> Ge <sub>0.065</sub> | 95.75             | 4.25              | 0.328                              | 24                      |
| Si <sub>0.920</sub> Ge <sub>0.080</sub> | 94.36             | 5.64              | 0.404                              | 24                      |
| Si <sub>0.850</sub> Ge <sub>0.150</sub> | 91.56             | 8.44              | 0.717                              | 48                      |
| Si <sub>0.800</sub> Ge <sub>0.200</sub> | 88.48             | 11.62             | 0.960                              | 48                      |
| Si <sub>0.700</sub> Ge <sub>0.300</sub> | 85.57             | 14.43             | 1.434                              | 48                      |
| Si <sub>0.600</sub> Ge <sub>0.400</sub> | 70.03             | 29.70             | 1.914                              | 48                      |

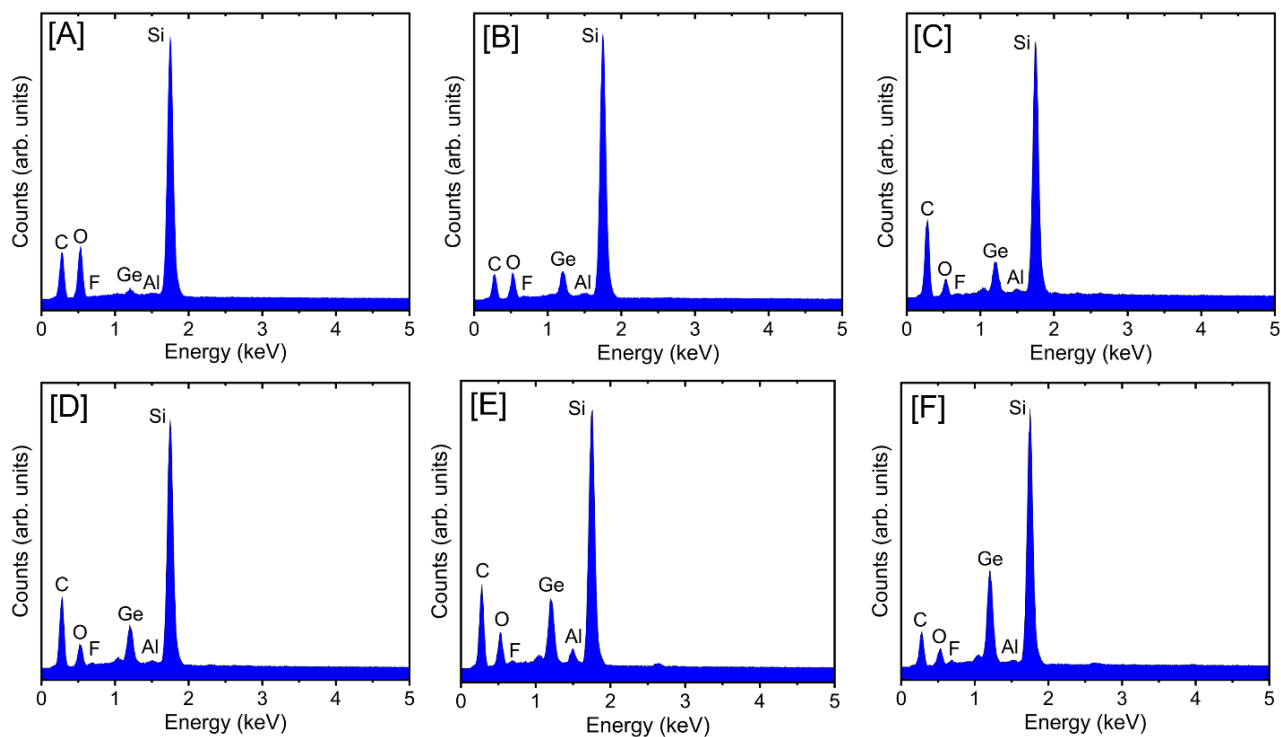

**Figure S1.** Representative SEM-EDS spectra of [A]  $\text{Si}_{0.988}\text{Ge}_{0.012}$ , [B]  $\text{Si}_{0.957}\text{Ge}_{0.043}$ , [C]  $\text{Si}_{0.944}\text{Ge}_{0.056}$ , [D]  $\text{Si}_{0.916}\text{Ge}_{0.084}$ , [E]  $\text{Si}_{0.884}\text{Ge}_{0.116}$ , and [F]  $\text{Si}_{0.856}\text{Ge}_{0.144}$  alloy NCs. Carbon originates from dodecyl ligands and carbon tape used to retain the  $\text{Si}_{1-x}\text{Ge}_x$  NCs on the sample holder. Oxygen and aluminum originate from the sample holder. Fluorine originates from Si-F ligands from etching.

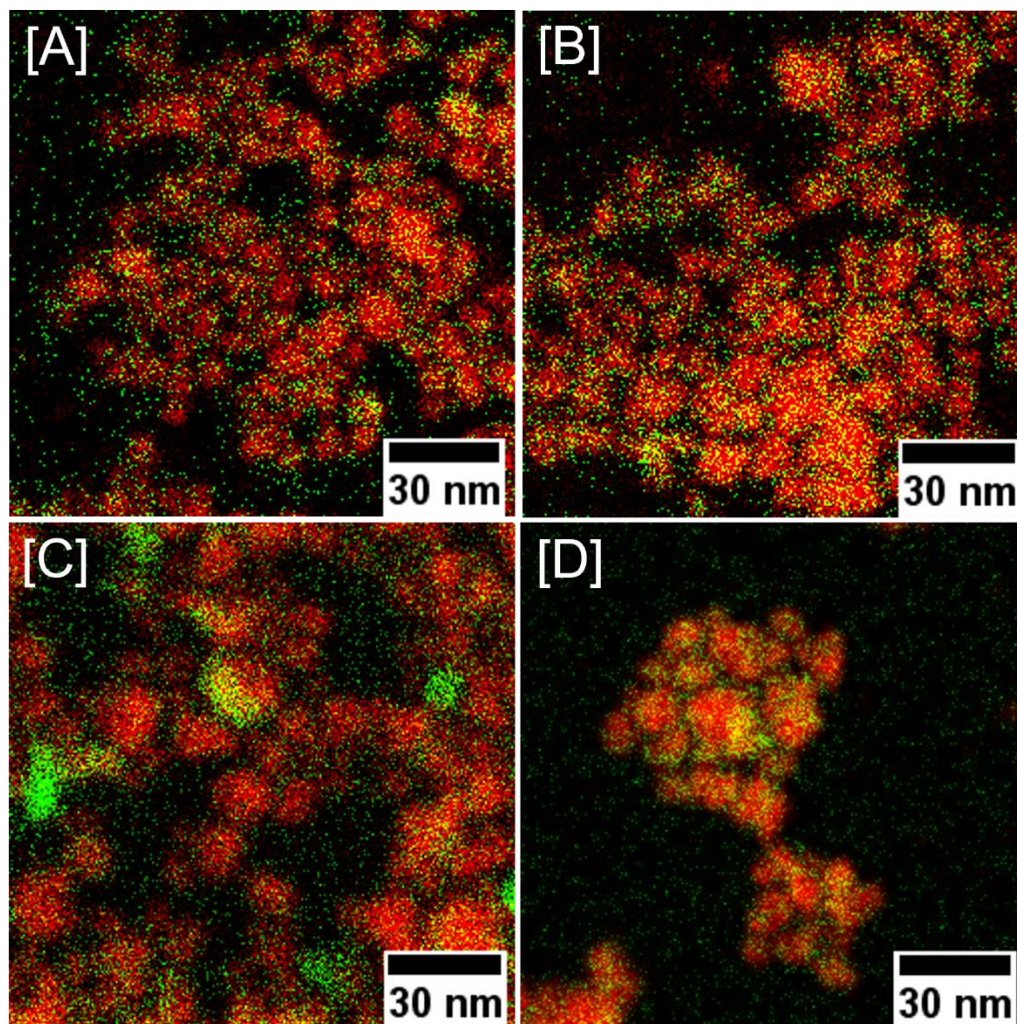

**Figure S2.** STEM-HAADF elemental map overlays of Si (red) and Ge (green) for [A]  $\text{Si}_{0.915}\text{Ge}_{0.085}$  NCs produced at 600 °C for 1 h, [B]  $\text{Si}_{0.905}\text{Ge}_{0.095}$  NCs produced at 600 °C for 4 h, [C]  $\text{Si}_{0.913}\text{Ge}_{0.087}$  NCs produced at 600 °C for 7 h, and [D]  $\text{Si}_{0.864}\text{Ge}_{0.137}$  NCs produced at 800 °C for 3 h.

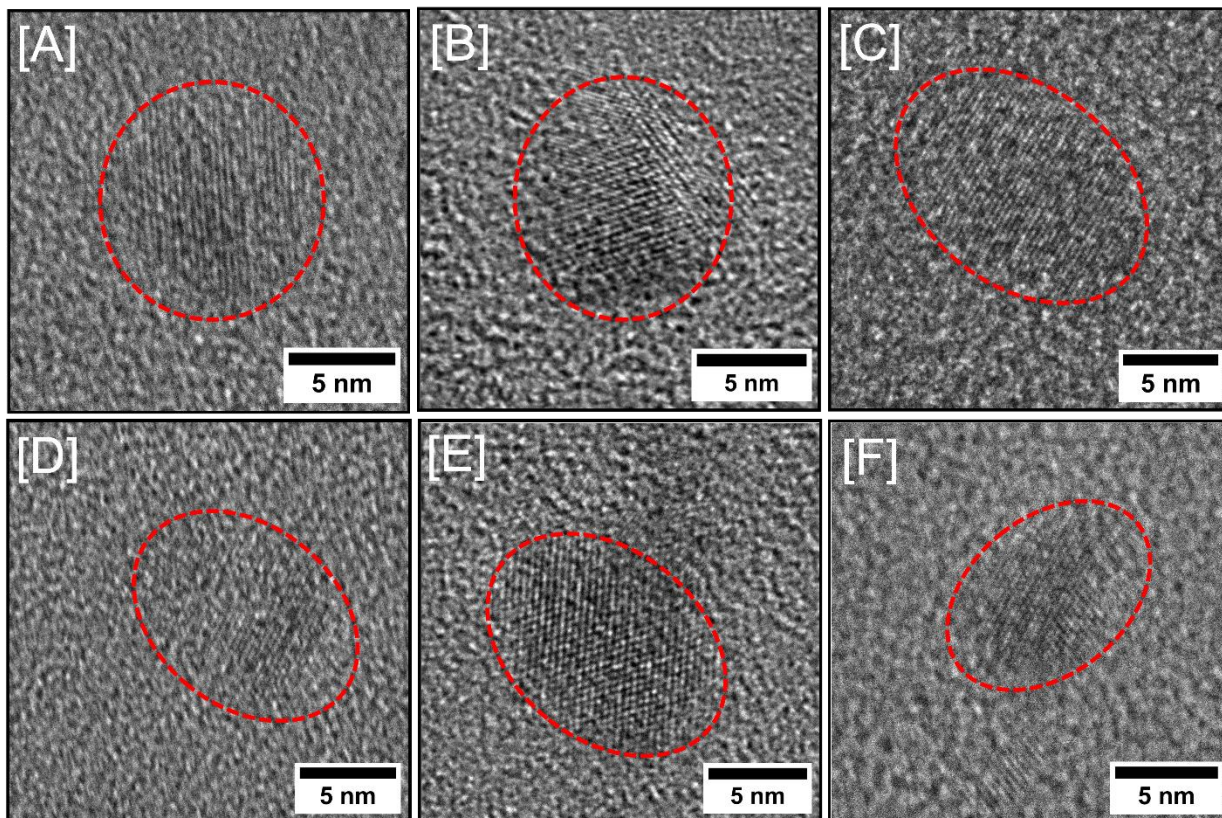

**Figure S3.** Representative HRTEM images of [A]  $\text{Si}_{0.988}\text{Ge}_{0.012}$ , [B]  $\text{Si}_{0.957}\text{Ge}_{0.043}$ , [C]  $\text{Si}_{0.944}\text{Ge}_{0.056}$ , [D]  $\text{Si}_{0.916}\text{Ge}_{0.084}$ , [E]  $\text{Si}_{0.884}\text{Ge}_{0.116}$ , and [F]  $\text{Si}_{0.856}\text{Ge}_{0.144}$  alloy NCs displaying lattice fringes. Red dashed ovals/circles represent particle shape for clarity.

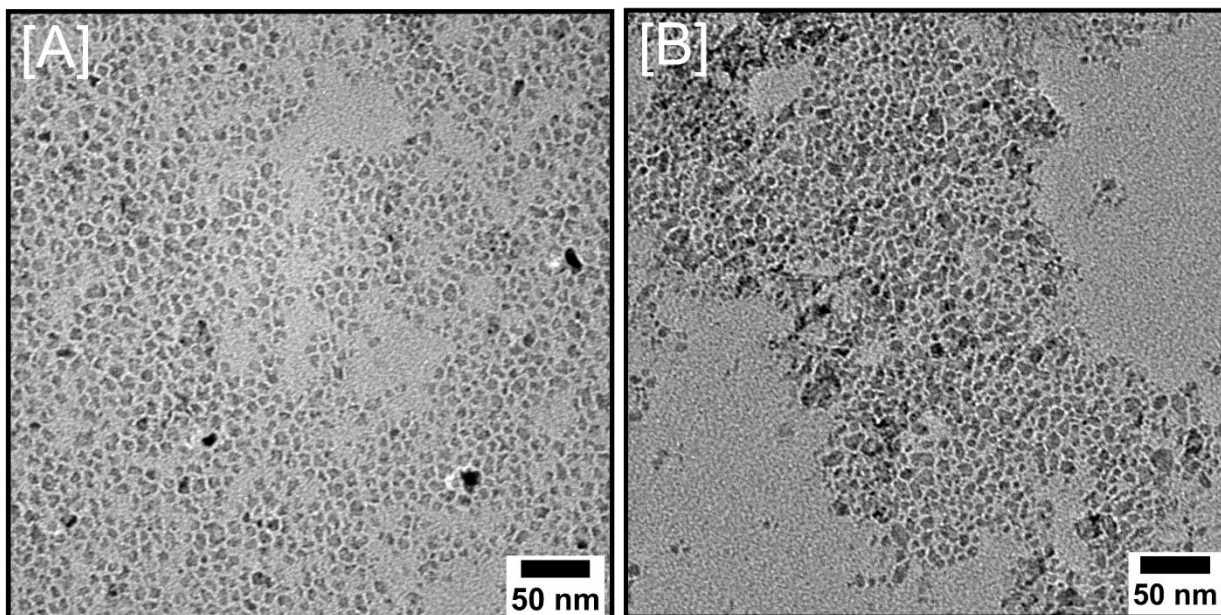

**Figure S4.** Representative TEM images of [A]  $\text{Si}_{0.944}\text{Ge}_{0.056}$ , [B]  $\text{Si}_{0.856}\text{Ge}_{0.144}$  alloy NCs.

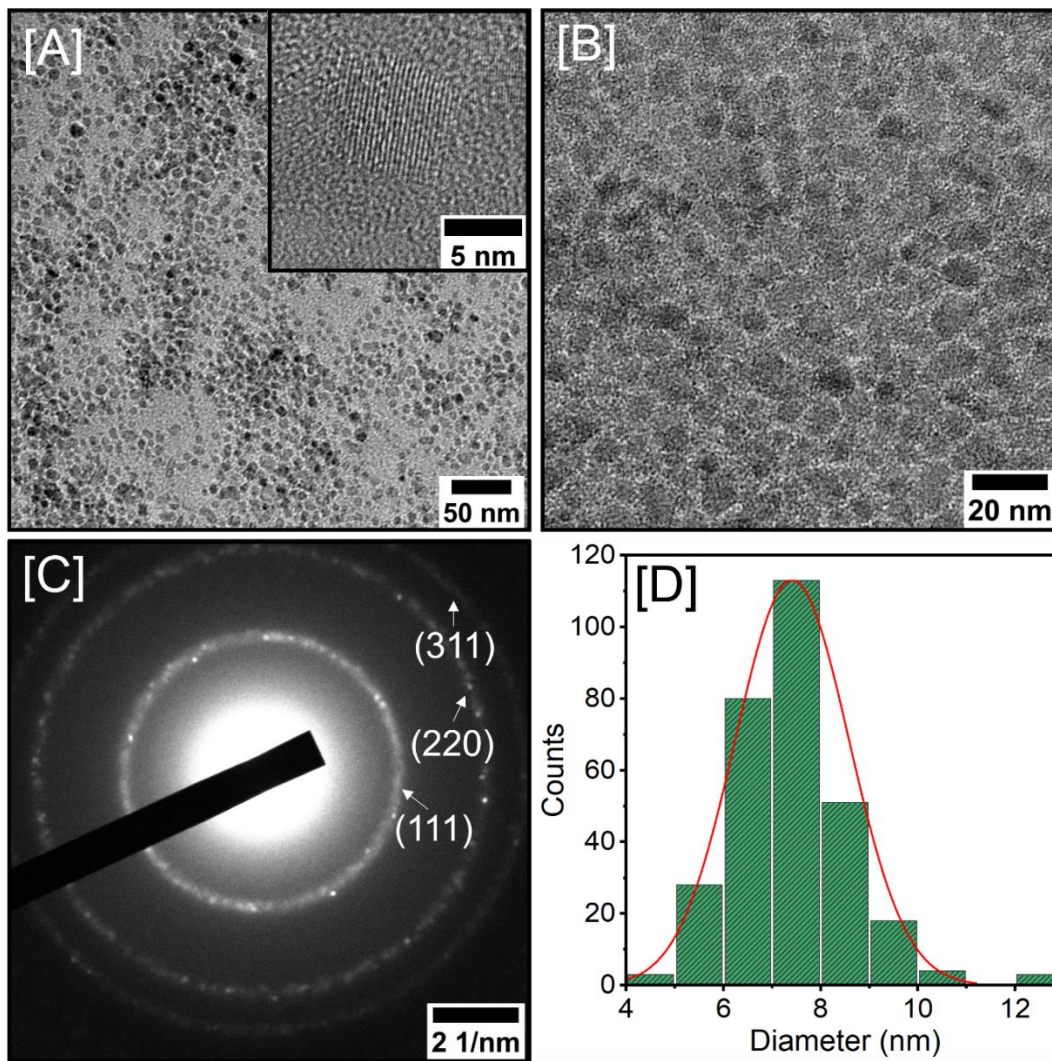

**Figure S5.** Representative [A-B] LRTEM images and [C] a SAED pattern of Si NCs produced at 1100 °C for 4 h. The inset in A shows a HRTEM image of a single particle. [D] Size histogram of Si NCs shown in [A].



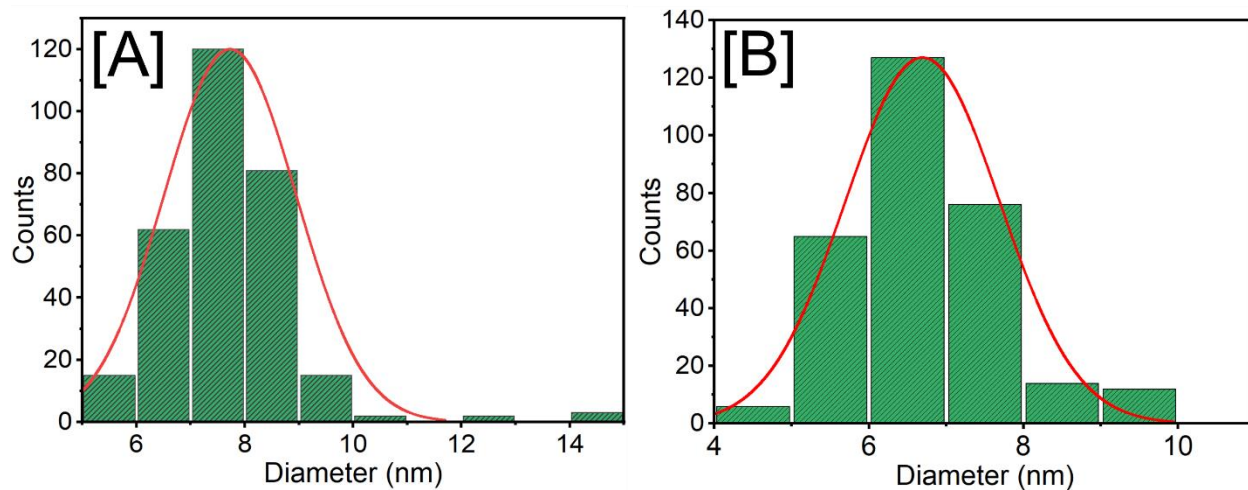

**Figure S6.** Size histograms of [A]  $\text{Si}_{0.944}\text{Ge}_{0.056}$  and [B]  $\text{Si}_{0.856}\text{Ge}_{0.144}$  alloy NCs shown in Figure S4A and B, respectively.

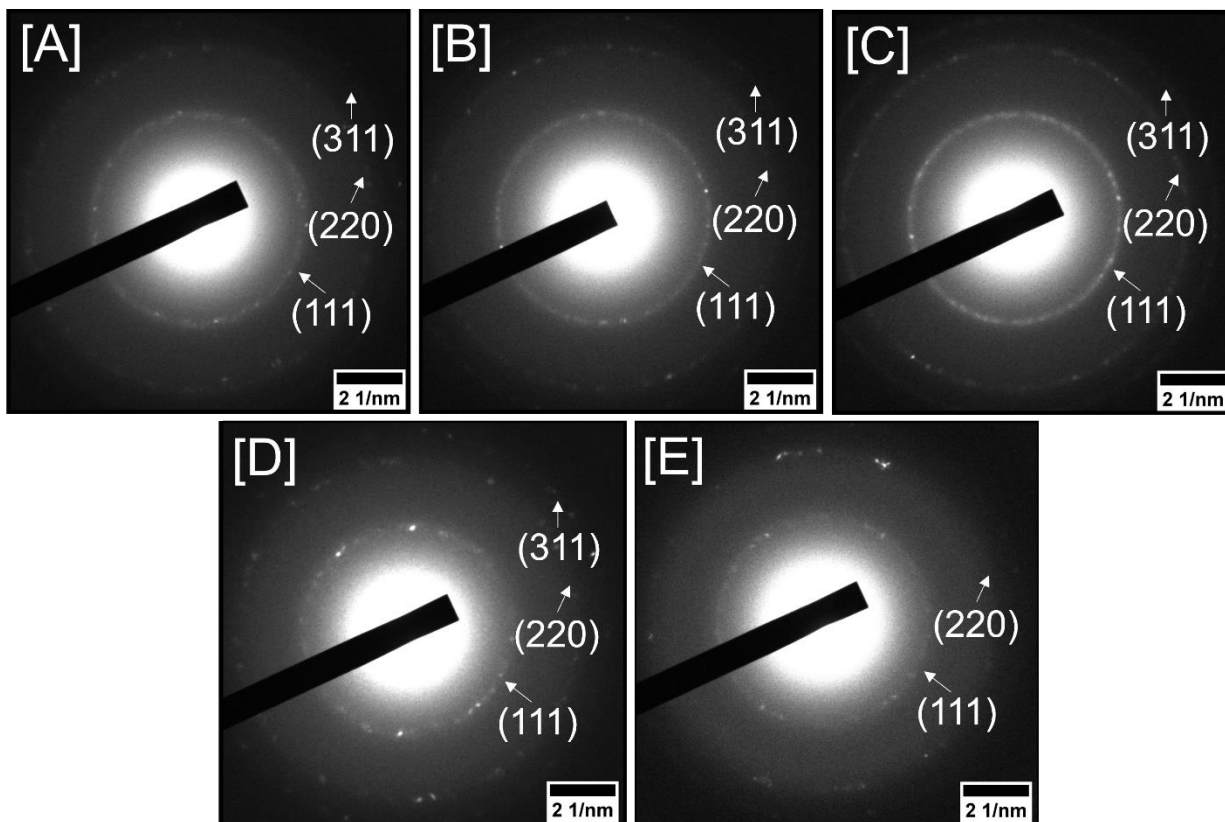

**Figure S7.** Representative SAED patterns of [A]  $\text{Si}_{0.988}\text{Ge}_{0.012}$ , [B]  $\text{Si}_{0.957}\text{Ge}_{0.043}$ , [C]  $\text{Si}_{0.944}\text{Ge}_{0.056}$ , [D]  $\text{Si}_{0.884}\text{Ge}_{0.116}$ , and [E]  $\text{Si}_{0.856}\text{Ge}_{0.144}$  alloy NCs.

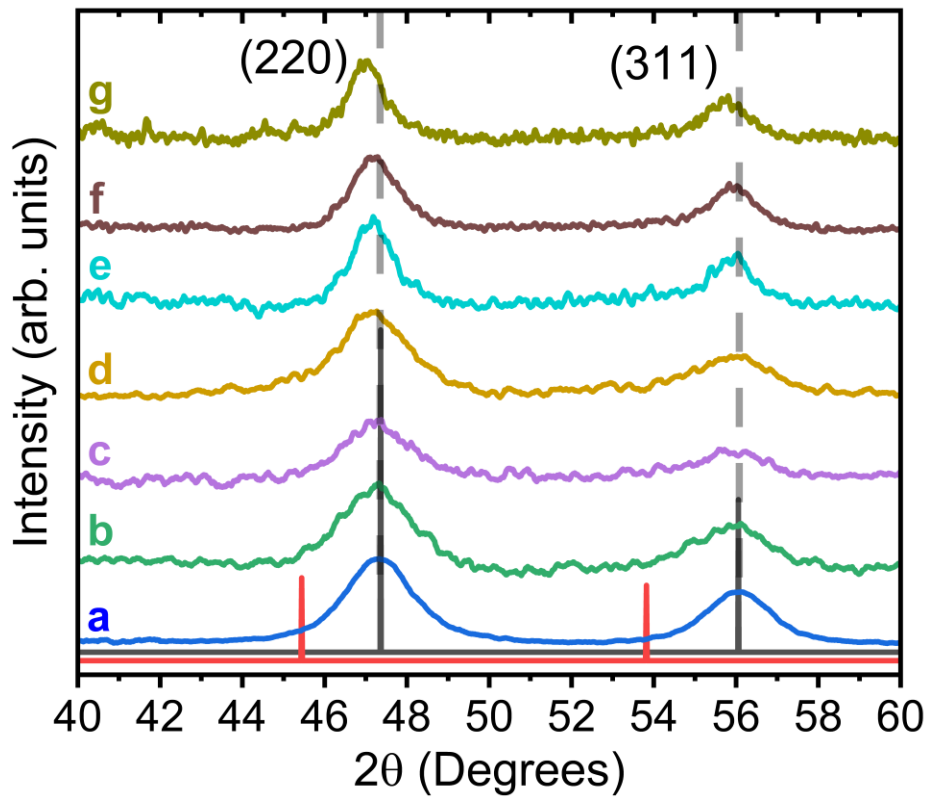

**Figure S8.** PXRD patterns displaying the (220) and (311) peaks of (a)  $\text{Si}_{1.000}\text{Ge}_{0.000}$ , (b)  $\text{Si}_{0.988}\text{Ge}_{0.012}$ , (c)  $\text{Si}_{0.957}\text{Ge}_{0.043}$ , (d)  $\text{Si}_{0.944}\text{Ge}_{0.056}$ , (e)  $\text{Si}_{0.916}\text{Ge}_{0.084}$ , (f)  $\text{Si}_{0.884}\text{Ge}_{0.116}$ , and (g)  $\text{Si}_{0.856}\text{Ge}_{0.144}$  alloy NCs. The ICDD-PDF overlays of diamond cubic Si (JCPDS 00-001-0971) and Ge (JCPDS 01-89-5011) are shown as vertical black/dashed and red lines, respectively.

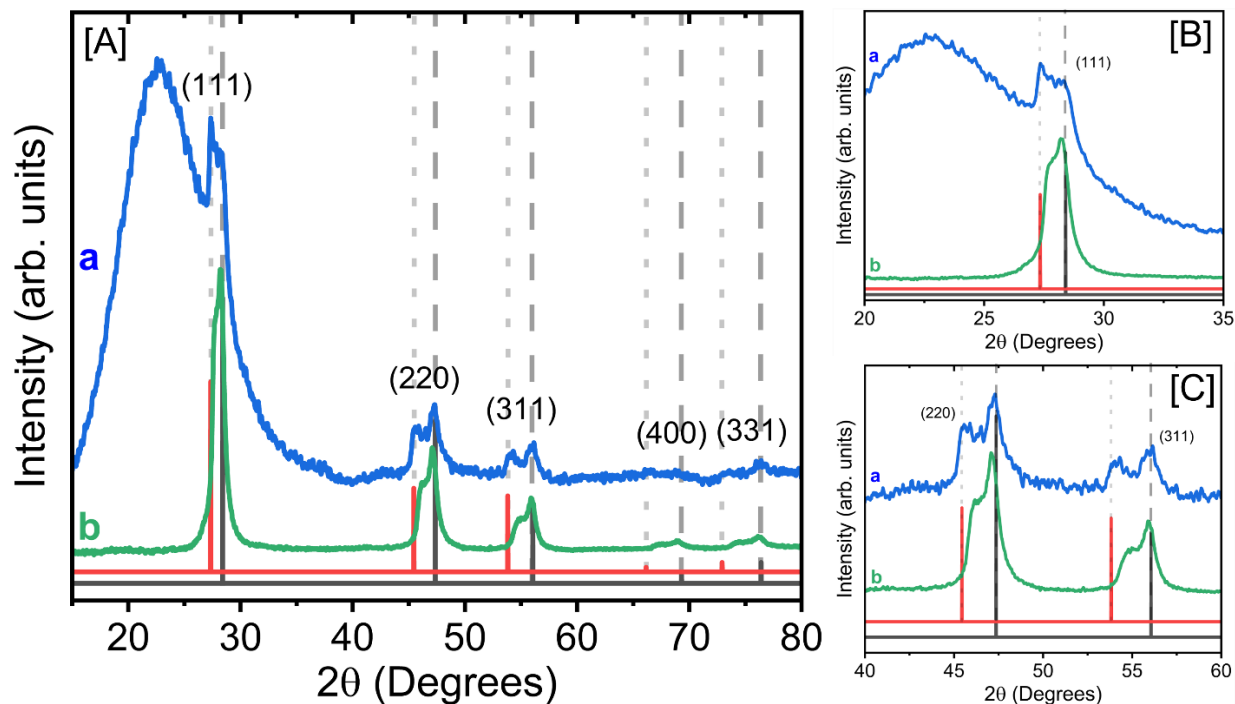

**Figure S9.** [A] PXRD patterns of (a)  $\text{Si}_{0.920}\text{Ge}_{0.080}$  NCs (nominal composition) embedded in silica matrix prior to HF etching and (b) colloidal unstable fraction obtained after HF etching and hydrosilylation/ hydrogermylation. The large hump at  $\sim 22^\circ$  corresponds to amorphous  $\text{SiO}_2$ . [B] and [C] are zoomed in figures of [A] showing (111) and (220) peaks. The ICCD-PDF overlays of diamond cubic Si (JCPDS 00-001-0971) and Ge (JCPDS 01-89-5011) are shown as vertical black/dashed and red/dotted lines, respectively.

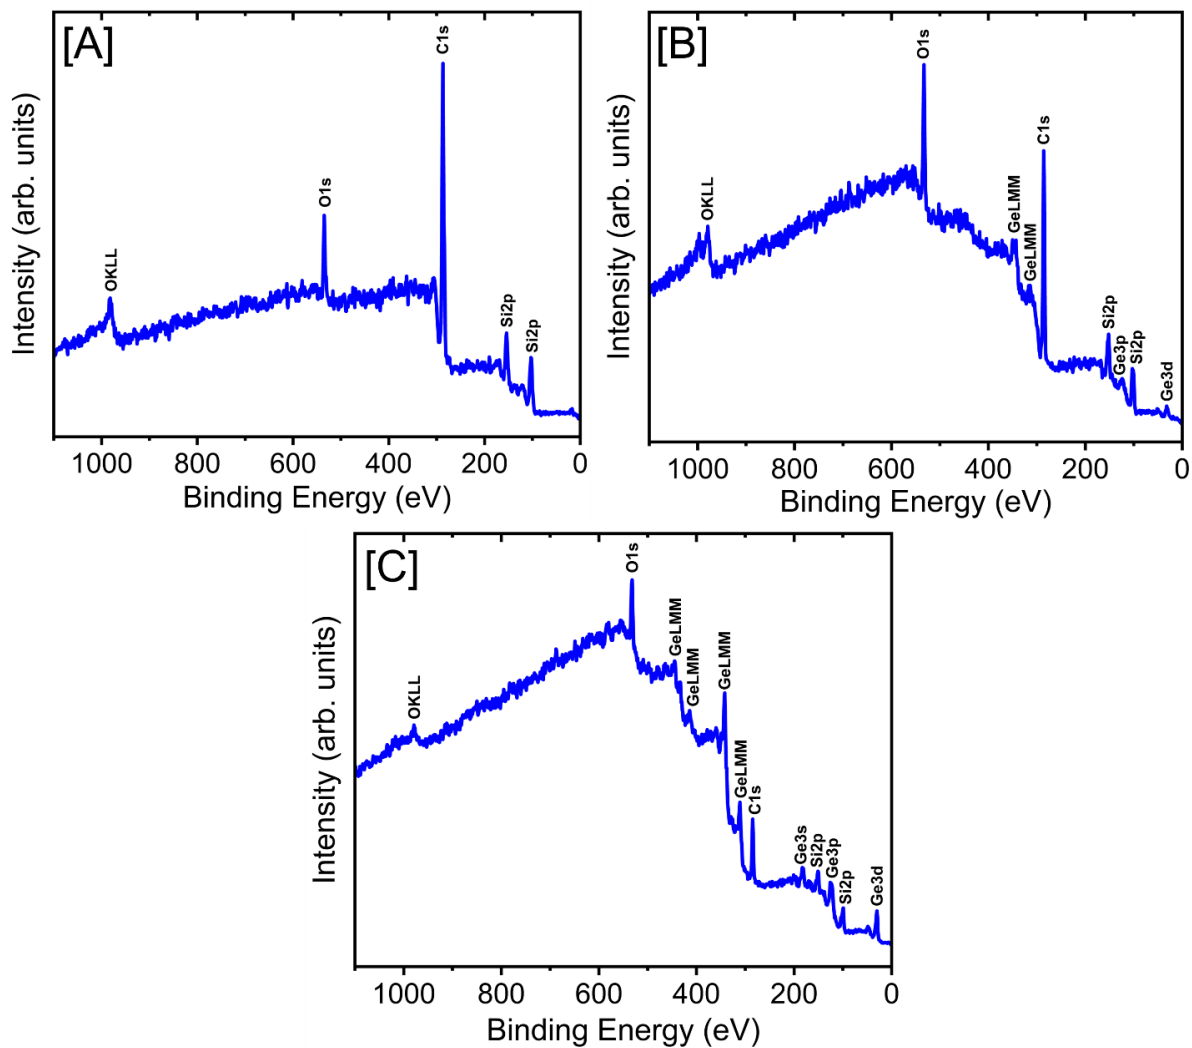

**Figure S10.** XPS survey scans of [A] Si, [B] Si<sub>0.856</sub>Ge<sub>0.144</sub> and [C] Si<sub>0.505</sub>Ge<sub>0.495</sub> alloy NCs.

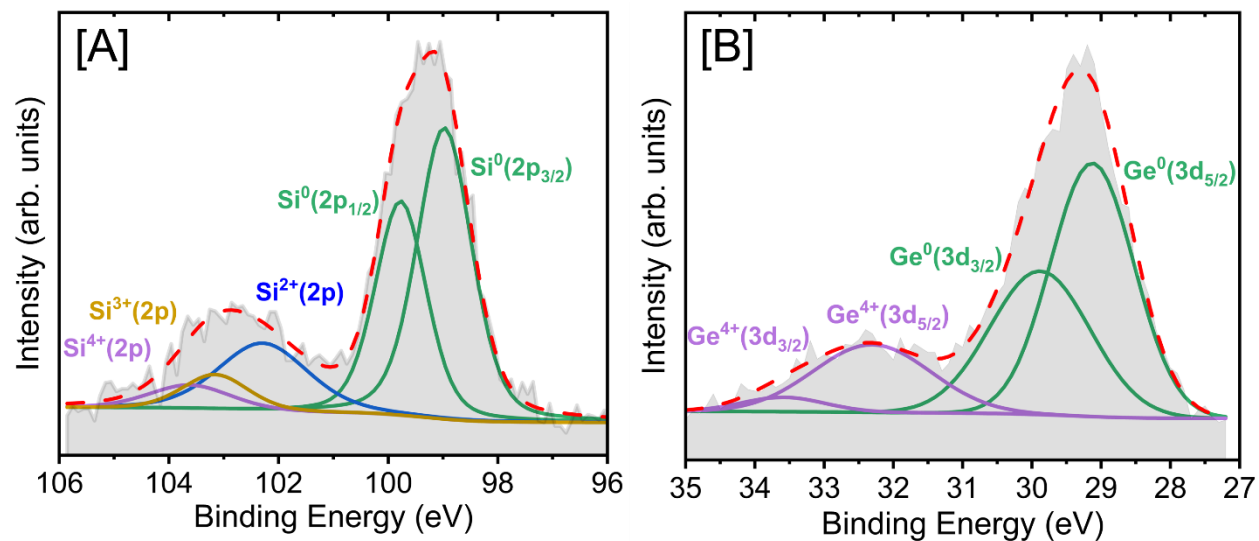

**Figure S11.** XPS spectra of the [A] Si 2p and [B] Ge 3d region of colloiddally unstable fraction of  $\text{Si}_{0.505}\text{Ge}_{0.495}$  NCs. The shaded (semitransparent) plot represents the spectral data. The green lines represent the  $\text{Si}^0$  and  $\text{Ge}^0$  species whereas the blue, tan, purple, and red lines represent  $\text{Si}^{2+}$ ,  $\text{Si}^{3+}$ ,  $\text{Si}^{4+}/\text{Ge}^{4+}$  species, and overall fitted envelope, respectively.

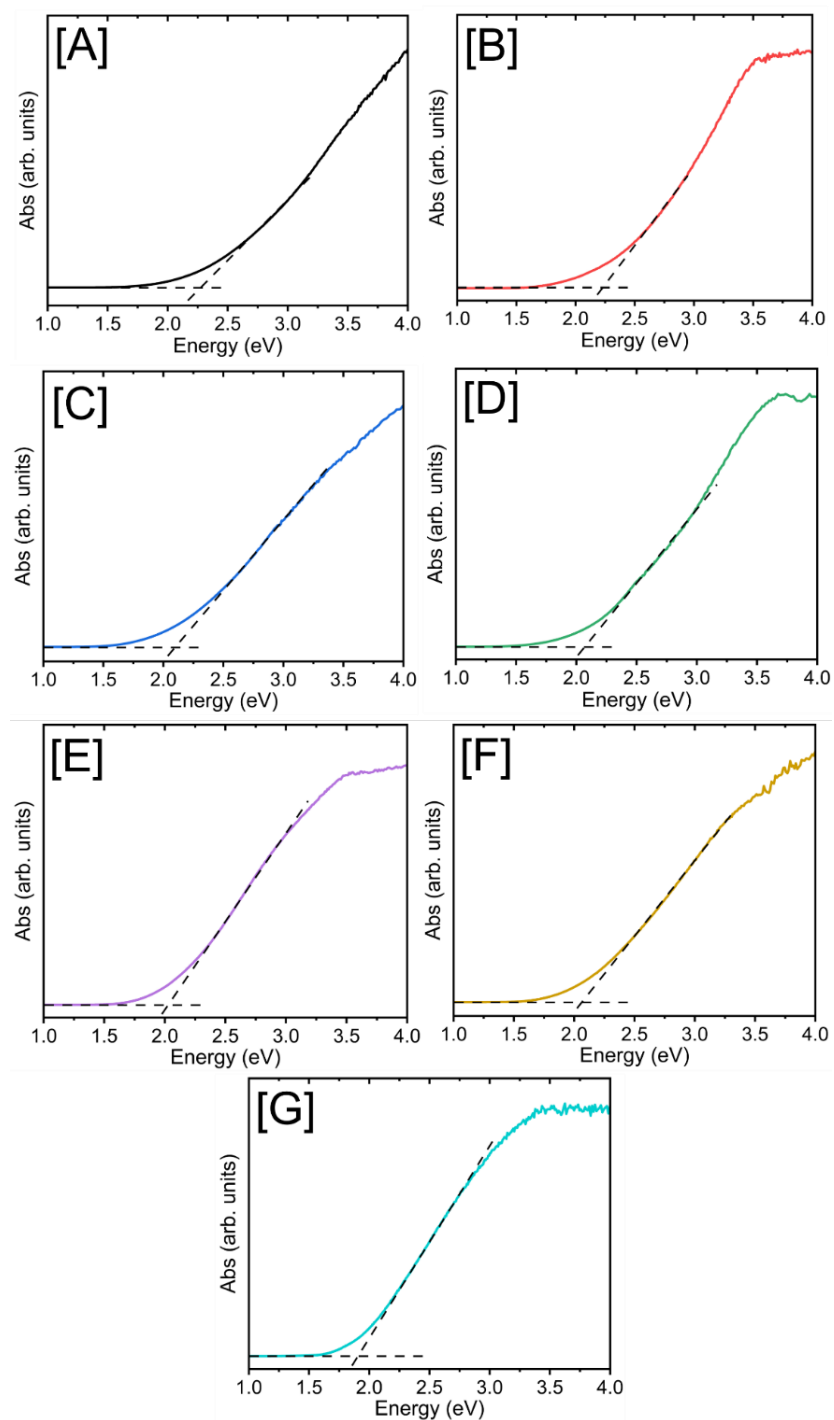

**Figure S12.** Solid-state diffuse reflectance spectra (converted to absorption using Kubelka-Munk remission function)<sup>1</sup> of (a)  $\text{Si}_{1.000}\text{Ge}_{0.000}$ , (b)  $\text{Si}_{0.988}\text{Ge}_{0.012}$ , (c)  $\text{Si}_{0.957}\text{Ge}_{0.043}$ , (d)  $\text{Si}_{0.944}\text{Ge}_{0.056}$ , (e)  $\text{Si}_{0.916}\text{Ge}_{0.084}$ , (f)  $\text{Si}_{0.884}\text{Ge}_{0.116}$ , and (g)  $\text{Si}_{0.856}\text{Ge}_{0.144}$  alloy NCs. The intersection of the dashed lines correspond to the energy gap where a least-squares linear regression analysis was applied.

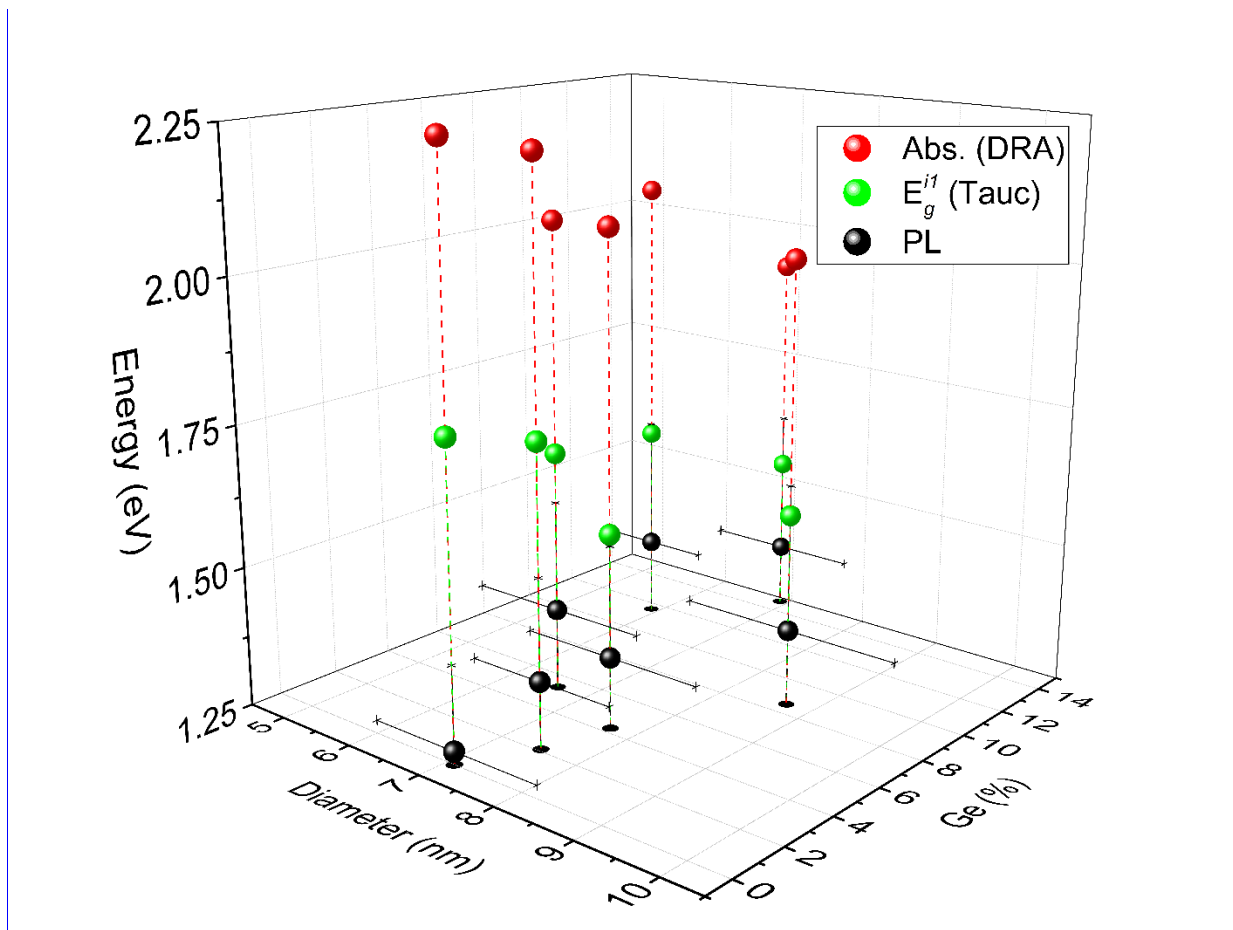

**Figure S13.** Energy gaps of  $\text{Si}_{1-x}\text{Ge}_x$  alloy NCs obtained from absorption onsets (red), indirect Tauc analysis (green), and PL peak maxima (black) plotted against experimental NC diameters (TEM) and Ge composition ( $x$ ). The full width at half maximum (FWHM) of PL peaks and NC size polydispersity are indicated by solid black error bars in the Z and X directions, respectively.



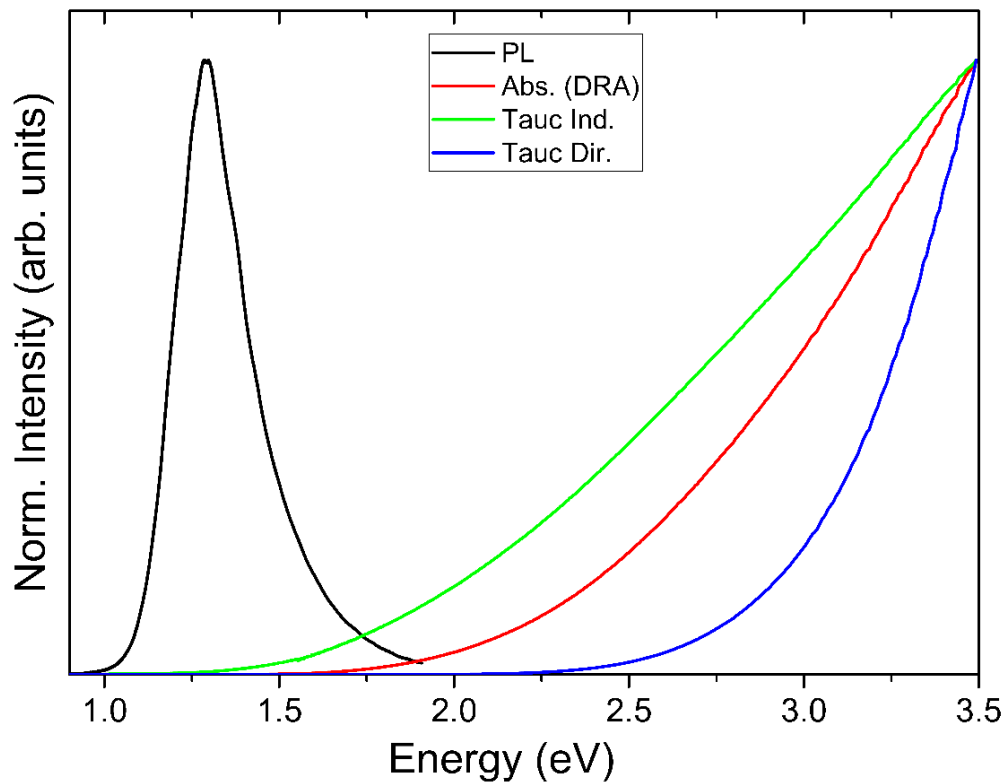

**Figure S14.** Solid-state PL (black) and absorption (red) spectra of  $7.2 \pm 0.7$  nm Si NCs along with Tauc plots obtained from direct (blue) and indirect (green) gap functions.

## QUANTUM YIELD MEASUREMENTS

Preliminary measurements of absolute quantum yield (QY) obtained according to the de Mello methodology<sup>2</sup> for a selection of the alloy NC samples (drop-casted on Si substrates) having Ge content  $<5.6\%$  indicate an average QY of approximately 1-5%. By comparison, QY values obtained from phase pure Si NCs of various diameters produced via a similar methodology span a range of  $\sim 8\text{-}30\%$ ,<sup>3</sup> indicating a potential increase in the fraction of nonradiative recombination sources associated with Ge alloying; attributed to composition-related defects in other works.<sup>4</sup>

## REFERENCES

1. A. Tsuge, Y. Uwamino, T. Ishizuka and K. Suzuki, *Appl. Spectrosc.*, 1991, **45**, 1377–1380.
2. J. C. de Mello, H. F. Wittmann, and R. H. Friend, *Adv. Mat.*, 1997, **9** (3), 230–232.
3. D. S. Pate, G. C. Spence, L. S. Graves, I. U. Arachchige and Ü. Özgür, *J. Phys. Chem. C*, 2024, **128**, 10483–10491.
4. S. Takeoka, K. Toshikiyo, M. Fujii, S. Hayashi and K. Yamamoto, *Phys. Rev. B*, 2000, **61**, 15988–15992.
